# Supplementary material for: Randomized Implementation of a Primary Human Papillomavirus Testing–based Cervical Cancer Screening Protocol for Women 34 to 69 Years in Norway
Source: PubMed Central journal article supplement — Cancer Epidemiol Biomarkers Prev. 2022 Jul 6;31(9):1812–22. doi: 10.1158/1055-9965.EPI-22-0340 (PMC9437559; doi:10.1158/1055-9965.epi-22-0340), 2022-07-06
Supplement: epi-22-0340_figure_s1_suppsf1.pdf [file epi-22-0340_figure_s1_suppsf1.pdf]

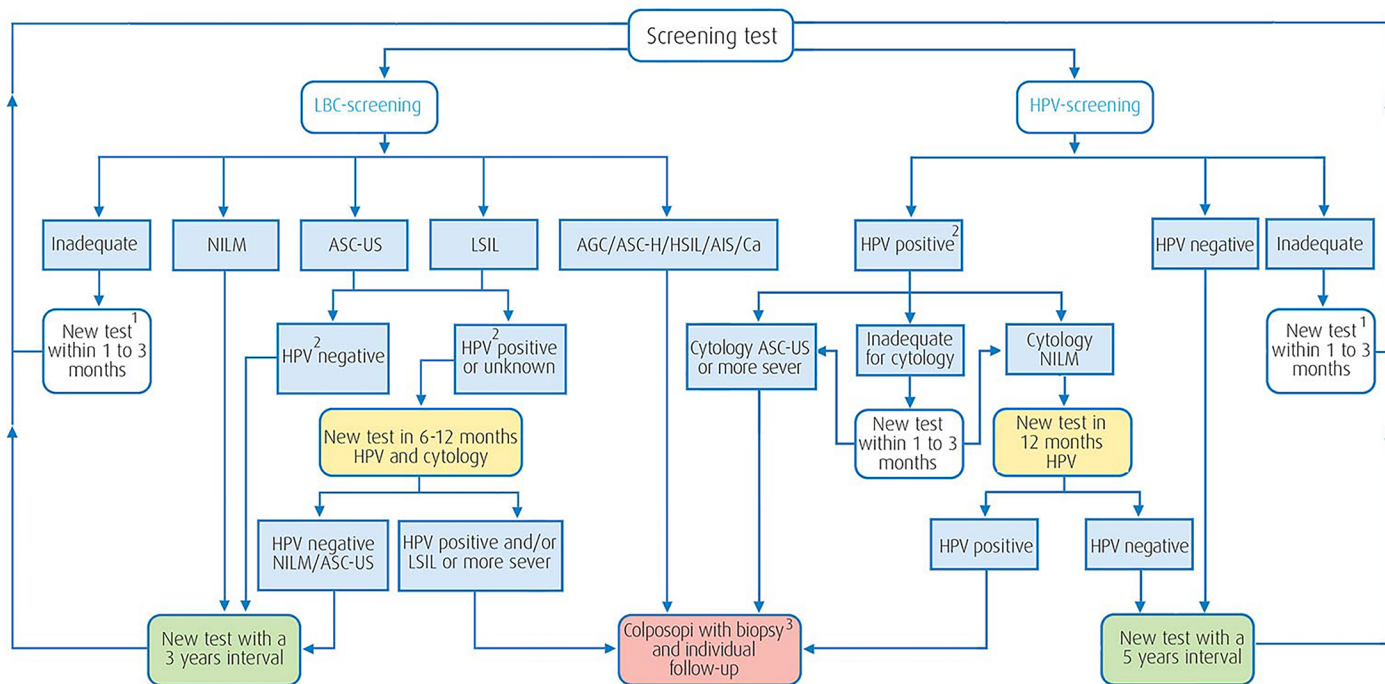

S1 Fig. The LBC-Screening protocol and the HPV-Screening protocol used by the Norwegian Cervical Cancer Screening Programme. The protocol was used in the period from 2015 to 2018 when implementing the HPV-Screening protocol in three counties among women aged 34 to 69 years. Of those who attended without invitation, only women without abnormal cytology, histology, or HPV test during the 2 years before the date of the screening examination were eligible. 1If the second sample is inadequate for cytologic examination, referral to gynaecologist is recommended. 2HPV testing is performed on liquid based sample. If the sample is a conventional smear, a new sample has to be taken within 6-12 months. 3Diagnostic colposcopy, including portio biopsies and endocervical abrasion, is performed according to the guidelines for gynaecologic oncology.
