# Supplementary material for: Randomized Implementation of a Primary Human Papillomavirus Testing–based Cervical Cancer Screening Protocol for Women 34 to 69 Years in Norway
Source: PubMed Central journal article supplement — Cancer Epidemiol Biomarkers Prev. 2022 Jul 6;31(9):1812–22. doi: 10.1158/1055-9965.EPI-22-0340 (PMC9437559; doi:10.1158/1055-9965.epi-22-0340), 2022-07-06
Supplement: epi-22-0340_figure_s2_suppsf2.pdf [file epi-22-0340_figure_s2_suppsf2.pdf]

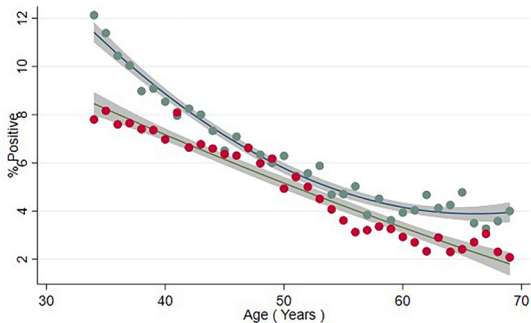

S2 Fig. Abnormal screening test related to age. Scatter plot illustrating the relationship between abnormal HPV test or LBC results and age for women allocated to the HPV-Screening protocol (blue dots) and the LBC-Screening protocol (red dots). The two-way quadratic prediction plot (calculated with logistic regression) predicting the proportion with abnormal test results by age is presented for the HPV-Screening protocol (blue line) and the LBC-Screening protocol (green line) along with 95% confidence intervals (shadow). Among women allocated to the HPV-Screening protocol, 10.2% aged 34-39 years and 3.9% aged 65-69 years had positive HPV test results. Among women allocated to the LBC-Screening protocol, 7.9% aged 34-39 years and 2.4% aged 65-69 years had abnormal, i.e. ASC-US+ LBC results.
