# Supplementary material for: Randomized Implementation of a Primary Human Papillomavirus Testing–based Cervical Cancer Screening Protocol for Women 34 to 69 Years in Norway
Source: PubMed Central journal article supplement — Cancer Epidemiol Biomarkers Prev. 2022 Jul 6;31(9):1812–22. doi: 10.1158/1055-9965.EPI-22-0340 (PMC9437559; doi:10.1158/1055-9965.epi-22-0340), 2022-07-06
Supplement: epi-22-0340_figure_s3_suppsf3.pdf [file epi-22-0340_figure_s3_suppsf3.pdf]

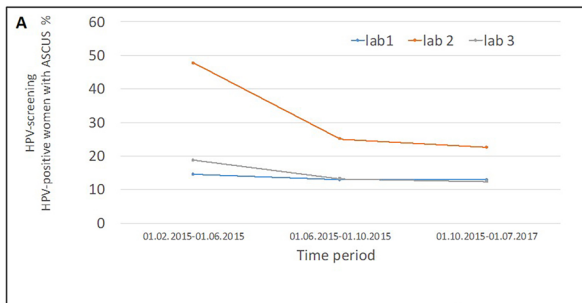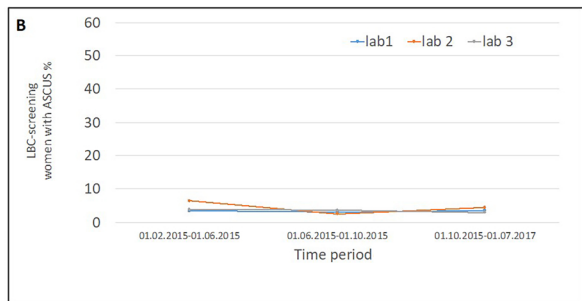

S3 Fig. Variation with time of cytological interpretations of atypical squamous cells of undetermined significance (ASC-US) by the three laboratories participating in the pilot programme. The percentage of samples diagnosed with ASC-US within the first 4 months, the preceding 4 months, and the remaining time period until 30 June 2017 for lab 1 (blue line), lab 2 (orange line), and lab 3 (grey line). (A) Women diagnosed with ASC-US among screen-positives in the HPV-Screening protocol. (B) Women diagnosed with ASC-US in the LBC-Screening protocol in lab 1 (blue line), lab 2 (orange line), and lab 3 (grey line).
